# Supplementary material
Source: PubMed Central journal article supplement (PMC7540165)
Supplement: ajtr0012-5308-f8.pdf [file ajtr0012-5308-f8.pdf]

MiR-613 alleviates IL-1 $\beta$ -induced injury in CHON-001 cells

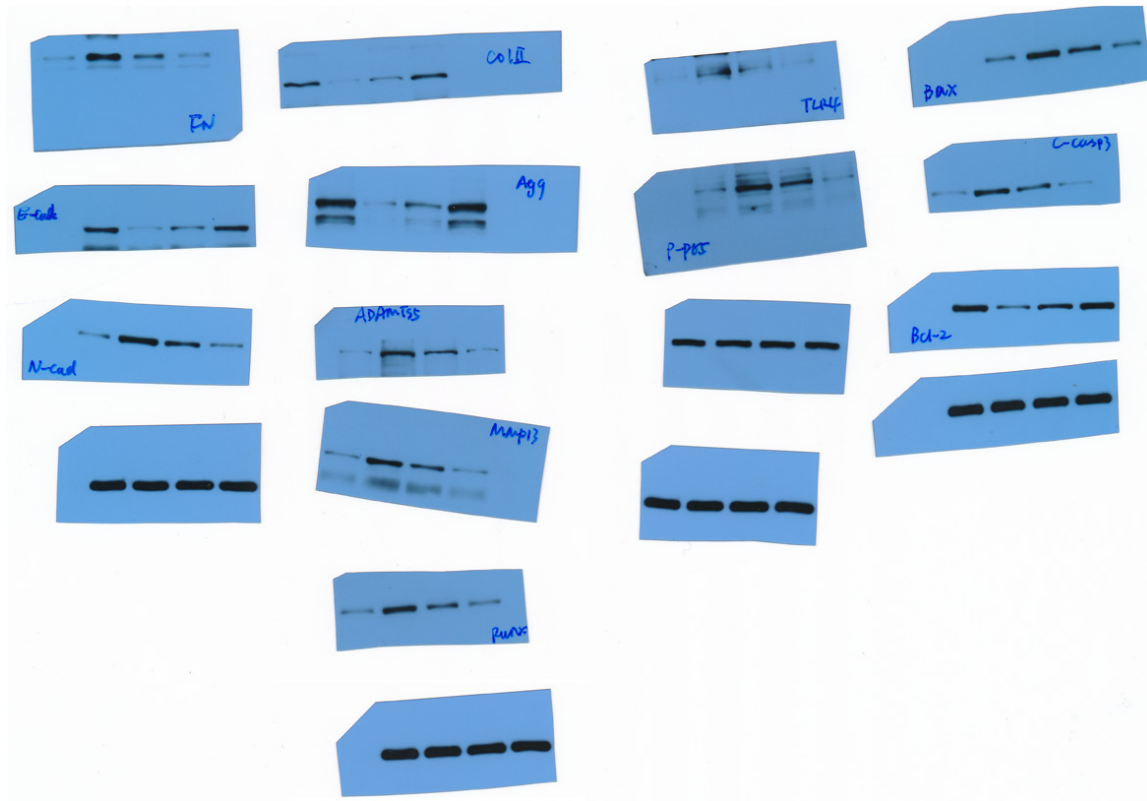

Supplementary Figure 1. The raw blots in western blotting experiment.
